# Supplementary material
Source: PubMed Central journal article supplement (PMC7484223)
Supplement: NIHMS1609793-supplement-Supp_info.pdf [file NIHMS1609793-supplement-Supp_info.pdf]

TITLE: Blockade of p38 kinase impedes the mobilization of pro-tumorigenic myeloid populations to impact breast cancer metastasis.

AUTHORS: Justin Zonneville, Sean Colligan, Sydney Grant, Alexandra Miller, Paul Wallace, Scott I. Abrams and Andrei V. Bakin

TABLE of CONTENT:

1. Supplementary Materials and Methods      pg. 1
2. Supplementary Figures 1-5                      pg. 2-6

| Reagent or Resource                                 | Source                                                             | Identifier                                                                                                                                                                                                                                                                                                                                                                                                           |
|-----------------------------------------------------|--------------------------------------------------------------------|----------------------------------------------------------------------------------------------------------------------------------------------------------------------------------------------------------------------------------------------------------------------------------------------------------------------------------------------------------------------------------------------------------------------|
| <i>Antibodies</i>                                   |                                                                    |                                                                                                                                                                                                                                                                                                                                                                                                                      |
| anti-GAPDH                                          | Santa Cruz Biotechnology                                           | Cat# sc-25778; RRID: AB_10167668                                                                                                                                                                                                                                                                                                                                                                                     |
| anti-p38                                            | Santa Cruz Biotechnology                                           | Cat# sc-81621; RRID: AB_1127392                                                                                                                                                                                                                                                                                                                                                                                      |
| anti-IkBa                                           | Santa Cruz Biotechnology                                           | Cat# sc-371; RRID: AB_2235952                                                                                                                                                                                                                                                                                                                                                                                        |
| anti-phospho-HSP27 (Ser82)                          | Cell Signaling Technology                                          | Cat# 2401; RRID: AB_331644                                                                                                                                                                                                                                                                                                                                                                                           |
| anti-phospho-p38                                    | Cell Signaling Technology                                          | Cat# 9211; RRID: AB_331641                                                                                                                                                                                                                                                                                                                                                                                           |
| anti-phospho-MAPKAPK2 (Thr222; 9A7)                 | Cell Signaling Technology                                          | Cat# 3316; RRID: AB_2141311                                                                                                                                                                                                                                                                                                                                                                                          |
| anti-phospho-MAPKAPK2 (Thr334; 27B7)                | Cell Signaling Technology                                          | Cat# 3007; RRID: AB_490936                                                                                                                                                                                                                                                                                                                                                                                           |
| anti-MAPKAPK-2 (D1E11) Rabbit mAb antibody          | Cell Signaling Technology                                          | Cat# 12155; RRID: AB_2797831                                                                                                                                                                                                                                                                                                                                                                                         |
| anti-alpha-Tubulin mouse mAb, Clone B-5-1-2         | Sigma-Aldrich                                                      | Cat# T6074; RRID: AB_477582                                                                                                                                                                                                                                                                                                                                                                                          |
| anti-FLAG, monoclonal M2 antibody                   | Sigma-Aldrich                                                      | Cat# F3165; RRID: AB_259529                                                                                                                                                                                                                                                                                                                                                                                          |
| Goat Anti-Rabbit IgG (H L)-HRP Conjugate antibody   | Bio-Rad                                                            | Cat# 170-6515; RRID: AB_11125142                                                                                                                                                                                                                                                                                                                                                                                     |
| Goat Anti-Mouse IgG (H L)-HRP Conjugate antibody    | Bio-Rad                                                            | Cat# 170-6516; RRID: AB_11125547                                                                                                                                                                                                                                                                                                                                                                                     |
| anti-Ly6G antibody, InVivoMab anti-mouse clone1A8   | Bio X Cell, West Lebanon                                           | Cat# BE0075-1; RRID: AB_1107721                                                                                                                                                                                                                                                                                                                                                                                      |
| InVivoMab rat IgG2a isotype control antibody        | Bio X Cell, West Lebanon                                           | Cat# BE0089; RRID: AB_1107769                                                                                                                                                                                                                                                                                                                                                                                        |
| Rat anti-mouse CD31 (PECAM) antibody                | BD Biosciences                                                     | Cat# 550274; RRID: AB_393571                                                                                                                                                                                                                                                                                                                                                                                         |
| Biotinylated secondary anti-rat antibody (goat)     | BD Biosciences                                                     | Cat# 559286; RRID: AB_397214                                                                                                                                                                                                                                                                                                                                                                                         |
| anti-CD 163, macrophage-associated antigen antibody | Novocastra                                                         | Cat# NCL-CD163; RRID: AB_563510                                                                                                                                                                                                                                                                                                                                                                                      |
| Rat anti-mouse F4/80 mAb (clone Cl:A3-1)            | Bio-Rad                                                            | Cat# MCA497RT; RRID: AB_1102558                                                                                                                                                                                                                                                                                                                                                                                      |
| Rabbit monoclonal anti-Ki67 (clone SP6)             | ThermoFisher                                                       | Cat# RM-9106-S1; RRID: AB_149792                                                                                                                                                                                                                                                                                                                                                                                     |
| anti-CD45 antibody                                  | BD Biosciences                                                     | Cat# 553080; RRID: AB_394610                                                                                                                                                                                                                                                                                                                                                                                         |
| anti-CD11b antibody                                 | BD Biosciences                                                     | Cat# 563553; RRID: AB_2738276                                                                                                                                                                                                                                                                                                                                                                                        |
| anti-CD8 antibody                                   | BD Biosciences                                                     | Cat# 553033; RRID: AB_394571                                                                                                                                                                                                                                                                                                                                                                                         |
| anti-Ly6C antibody                                  | Biolegend                                                          | Cat# 128032; RRID: AB_2562178                                                                                                                                                                                                                                                                                                                                                                                        |
| anti-Ly6G antibody                                  | Biolegend                                                          | Cat# 127607; RRID: AB_1186104                                                                                                                                                                                                                                                                                                                                                                                        |
| anti-CD4 antibody                                   | Biolegend                                                          | Cat# 100552; RRID: AB_2563053                                                                                                                                                                                                                                                                                                                                                                                        |
| <i>Chemicals, Peptides and Cytokines</i>            |                                                                    |                                                                                                                                                                                                                                                                                                                                                                                                                      |
| D-luciferin                                         | Gold Biotechnology, St Louis                                       | LUCK-1G                                                                                                                                                                                                                                                                                                                                                                                                              |
| Ralimetinib (LY2228820)                             | Selleck Chemicals                                                  | Cat# S1494                                                                                                                                                                                                                                                                                                                                                                                                           |
| Recombinant human TNF alpha                         | ProSpec-Tany TechnoGene Ltd.                                       | CYT-223                                                                                                                                                                                                                                                                                                                                                                                                              |
| TRIZOL Reagent                                      | Invitrogen                                                         | Cat# 15596-026                                                                                                                                                                                                                                                                                                                                                                                                       |
| ELISA assays for mouse Ccl2/MCP1                    | BioLegend                                                          | Cat# 432704, lot# B257711                                                                                                                                                                                                                                                                                                                                                                                            |
| Collagenase/Hyaluronidase (10X in DMEM)             | StemCell Technologies                                              | Cat# 07912                                                                                                                                                                                                                                                                                                                                                                                                           |
| G-CSF                                               | Peprotech                                                          | Cat# 250-05                                                                                                                                                                                                                                                                                                                                                                                                          |
| GM-CSF                                              | Peprotech                                                          | Cat# 315-03                                                                                                                                                                                                                                                                                                                                                                                                          |
| CellTrace Violet Dye                                | Invitrogen                                                         | Cat# C34557                                                                                                                                                                                                                                                                                                                                                                                                          |
| <i>Special Instruments and Reagents</i>             |                                                                    |                                                                                                                                                                                                                                                                                                                                                                                                                      |
| Luminex 200 system                                  | Luminex                                                            |                                                                                                                                                                                                                                                                                                                                                                                                                      |
| Human Cytokine/Chemokine Panel                      | EMD Millipore                                                      | Milliplex Magnetic Bead 41-Plex: EGF, Eotaxin, FGF-2, Flt-3L, Fractalkine, G-CSF, GM-CSF, GRO, IFN $\alpha$ 2, IFN $\gamma$ , IL-10, IL-12p40, IL-12p70, IL-13, IL-15, IL-17A, IL-1 $\alpha$ , IL-1 $\beta$ , IL-1RA, IL-2, IL-3, IL-4, IL-5, IL-6, IL-7, IL-8, IL-9, IP-10, MCP-1, MCP-3, MDC, MIP-1 $\alpha$ , MIP-1 $\beta$ , PDGF, PDGF-AA, RANTES, sCD40L, TGF $\alpha$ , TNF $\alpha$ , TNF $\beta$ , and VEGF |
| <i>Human Primers</i>                                |                                                                    |                                                                                                                                                                                                                                                                                                                                                                                                                      |
| <i>Sequences</i>                                    |                                                                    |                                                                                                                                                                                                                                                                                                                                                                                                                      |
| CCL2                                                | Forward: GCCTCCAGCATGAAAGTCTC<br>Reverse: AGGTGACTGGGGCATTGAT      |                                                                                                                                                                                                                                                                                                                                                                                                                      |
| 5S rRNA                                             | Forward: GGCCATACCCCTGAACGC<br>Reverse: AGCCTACAGCACCCGGTATT       |                                                                                                                                                                                                                                                                                                                                                                                                                      |
| <i>Mouse Primers</i>                                |                                                                    |                                                                                                                                                                                                                                                                                                                                                                                                                      |
| <i>Sequences</i>                                    |                                                                    |                                                                                                                                                                                                                                                                                                                                                                                                                      |
| S100a8                                              | Forward: CCGTCTCAAGACATCGTTTGA<br>Reverse: GTAGAGGGCATGGTGATTTCT   |                                                                                                                                                                                                                                                                                                                                                                                                                      |
| Mmp8                                                | Forward: TGCCACGATGGTTGCAGAG<br>Reverse: AGGCATTTCCATAATCCCATTTG   |                                                                                                                                                                                                                                                                                                                                                                                                                      |
| Cxcr2                                               | Forward: ATGCCCTCTATTCTGCCAGAT<br>Reverse: GTGCTCCGGTTGTATAAGATGAC |                                                                                                                                                                                                                                                                                                                                                                                                                      |
| Csf2rb                                              | Forward: GTGGAGCGAAGAGTACACTTG<br>Reverse: CCAAAGCGAAGGATCAGGAG    |                                                                                                                                                                                                                                                                                                                                                                                                                      |
| 5S rRNA                                             | Forward: GGCCATACCCCTGAACGC<br>Reverse: AGCCTACAGCACCCGGTATT       |                                                                                                                                                                                                                                                                                                                                                                                                                      |

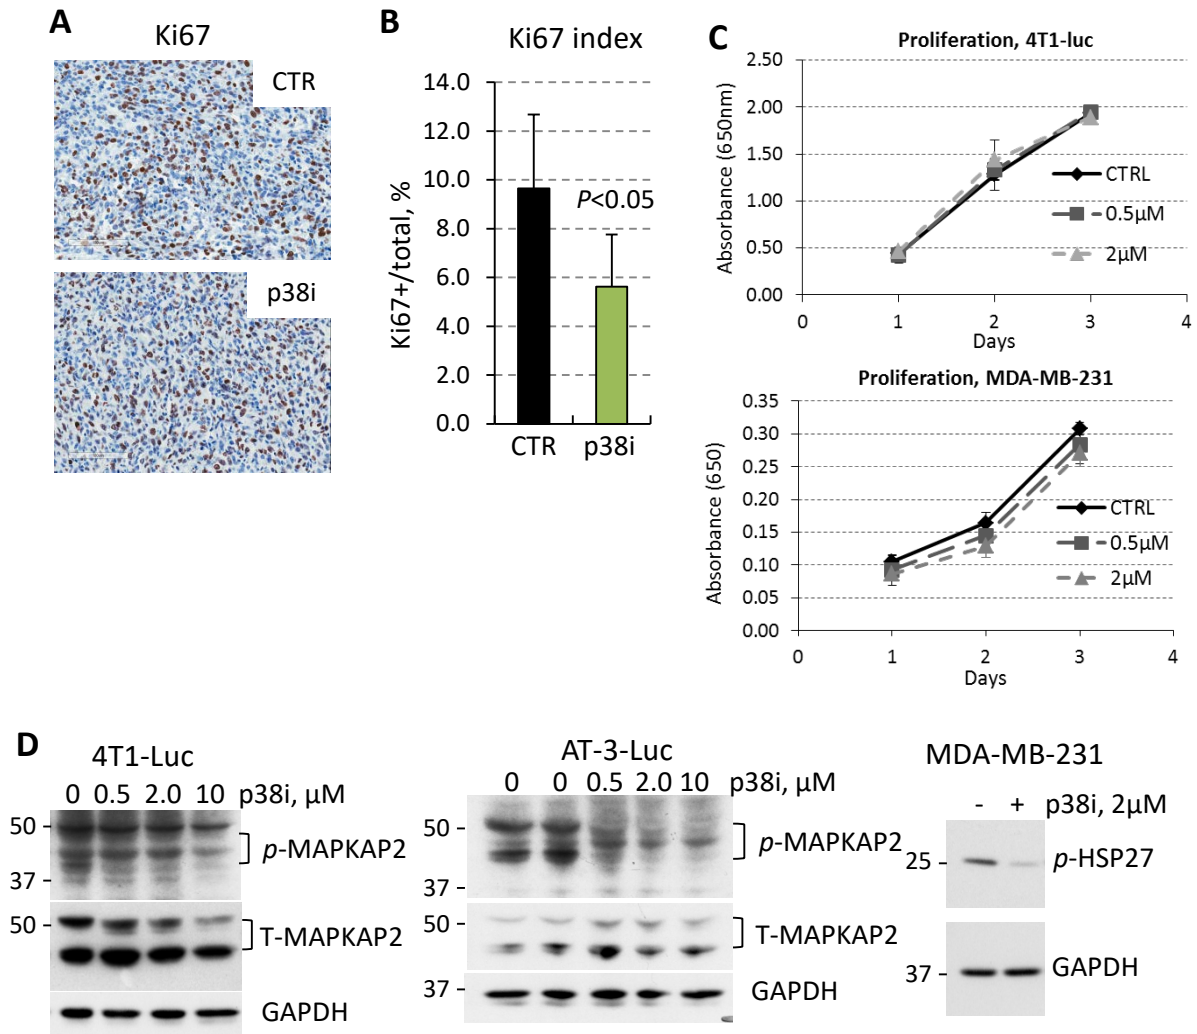

**Supplementary Figure 1.** (A) Images of Ki67-stained tumor sections from control and Ralimetinib-treated tumor-bearing animals. (B) Quantification of the proliferation index using Ki67-stained tumor tissues, 3 sections per tumor, 3 tumors per group. (C) Proliferation of cancer cell lines in the absence or presence of p38i (Ralimetinib). (D) Immunoblotting of whole-cell extracts from tumor cells treated with various doses of p38i Ralimetinib for 6 hours.

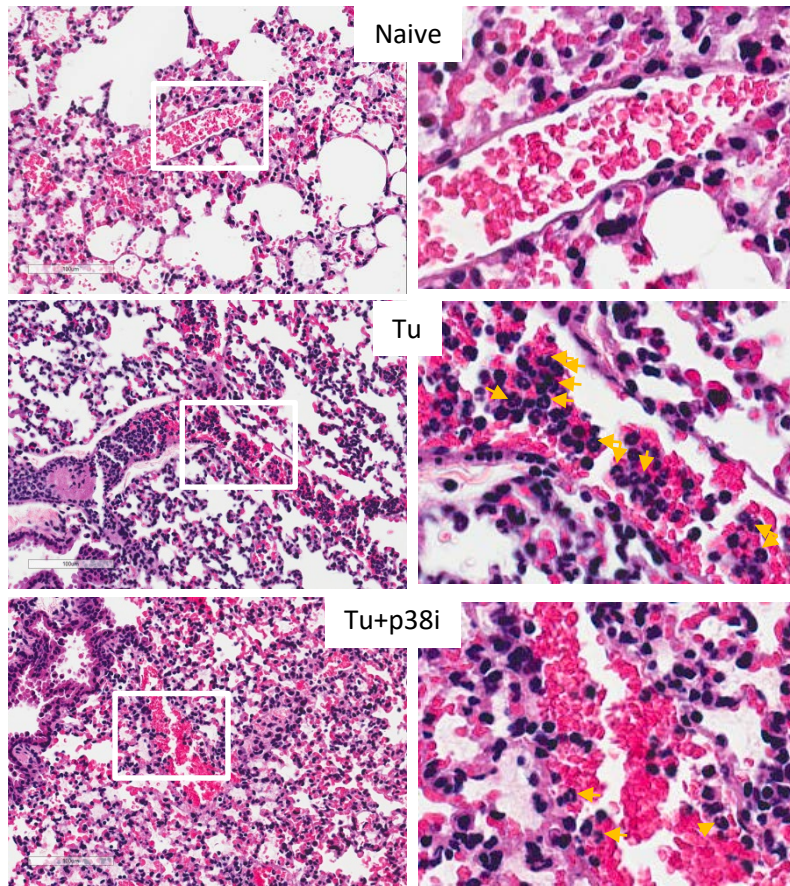

**Supplementary Figure 2. Blockade of p38 reduces the accumulation of MDSCs in the lungs of tumor-bearing mice.** Images of H&E-stained lung tissues from tumor-free (naïve), 4T1-Luc tumor-bearing (Tu) and tumor-bearing mice treated with p38i at study endpoint, bar=100 $\mu$ m. Panels on the right show enlarged images of the outlined areas with myeloid cells within blood vessels.

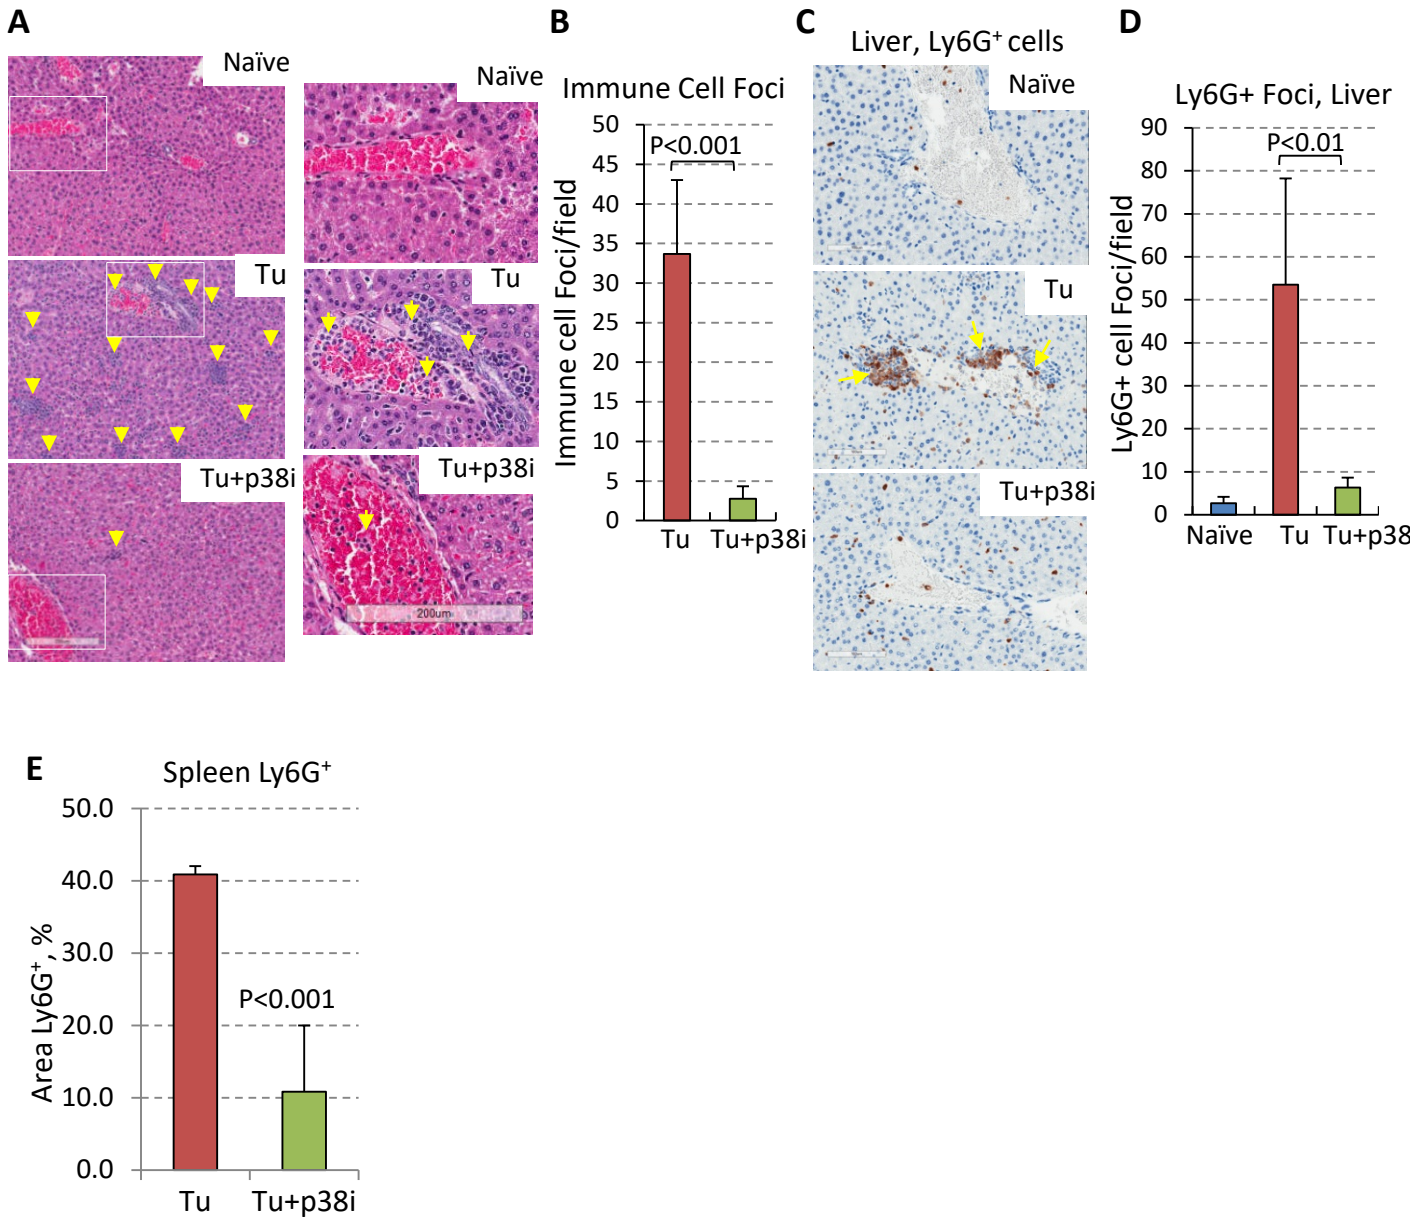

**Supplementary Figure 3. Blockade of p38 reduces accumulation of PMN-MDSCs in the liver and spleen of tumor-bearing mice.** (A) Images of H&E-stained liver sections from tumor-free (naïve), 4T1-Luc tumor-bearing (Tu) and tumor-bearing mice treated with p38i at study endpoint (14 days). Enlarged images of the outlined areas show the presence of myeloid cells within and in the proximity of blood vessels. Yellow arrows show clusters of myeloid cells, bar=200µm. (B) Quantification of myeloid cell foci in the liver tissues reflecting: the number of foci per field, 3 fields per section, 3 mice per group. (C) Detection of Ly6G<sup>+</sup> cell foci in liver tissues. Note, these foci are localized in the proximity of blood vessels, bar=100µm. (D) Quantification of Ly6G<sup>+</sup> cell foci in the liver sections reflecting 3 fields per section, 3 mice per group. (E) Quantification of Ly6G<sup>+</sup> cells in the spleen sections (IHC, Ly6G), 3 fields per section, 3 mice per group. Comparisons were done with material from naïve and comparable-size tumor groups and statistical significance was determined using the two-tailed unpaired t-test.



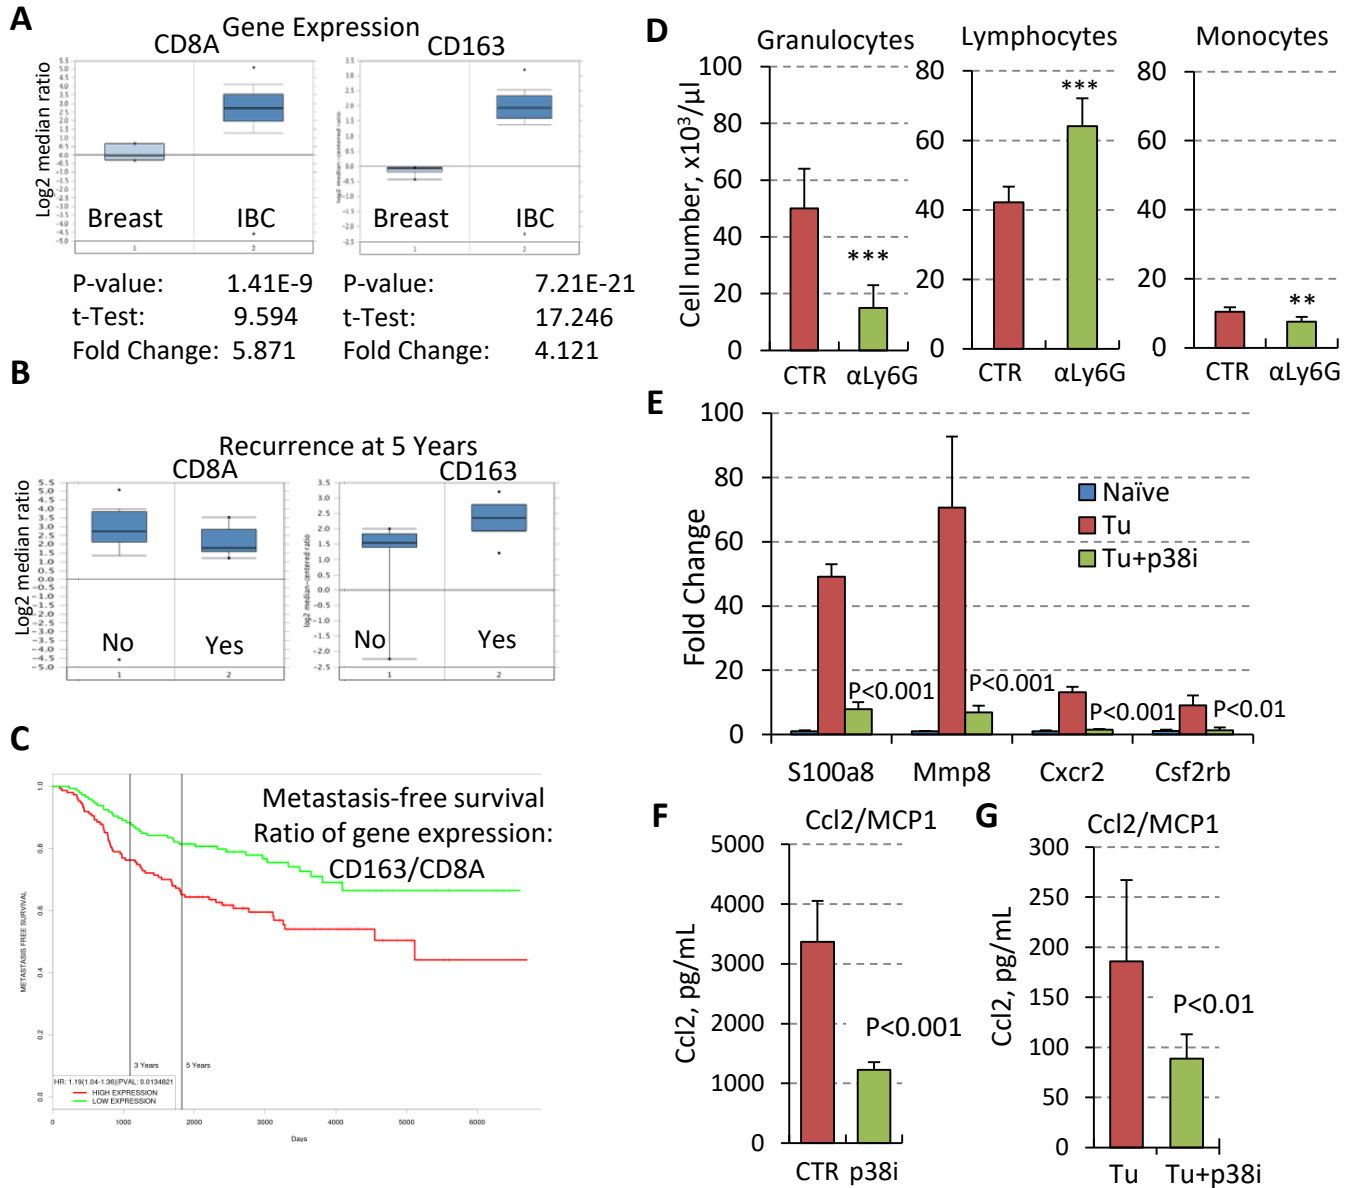

**Supplementary Figure 4. The role of TAMs and PMN-MDSCs.** (A) Expression of CD8A and CD163 in stromal compartments of human breast cancers. The data are generated with *OncoPrint* web-tool using the dataset of the Finak Breast Cancer Stroma Study [Finak et al., 2008, *Nature Medicine* **14**(5): 518-527]. (B) Breast cancer recurrence at 5 years using *OncoPrint* and the Finak Breast Cancer Stroma Study. (C) Kaplan-Meier estimation of the metastasis-free survival of breast cancer patients and CD163/CD8A expression ratio using a dataset [Drukker et al., 2014, *Breast Cancer Research and Treatment* **143**(3): 587-592] and a prognostic *PROGeneV2* tool. (D) Complete Blood Counts (CBCs) were performed on peripheral blood at endpoint of the anti-Ly6G study. Blood was collected by cardiac puncture and assayed using the HemaTrue Analyzer and HeskaView Integrated Software version 2.5.2. (E) Quantitative RT-PCR of S100a8, Mmp8, Cxcr2, and Csf2rb mRNA expression in the lungs of naïve (tumor-free control), tumor-bearing (Tu), or Tu mice treated with Ralimetinib. The assays were done in triplicates using two lungs per group from the study described in Figure 2. (F) Evaluation of Ccl2/MCP1 by ELISA assays in conditioned media from 4T1 cells treated with vehicle-control (DMSO) or 2 μM of p38i Ralimetinib for 48 hours. (G) ELISA assays for Ccl2/MCP1 in 4T1 tumor extracts from mice treated by p38i at day 14. Comparisons were done with material from comparable-size tumor groups and statistical significance was determined using the two-tailed unpaired t-test (\*\*P<0.01; \*\*\*P<0.001).

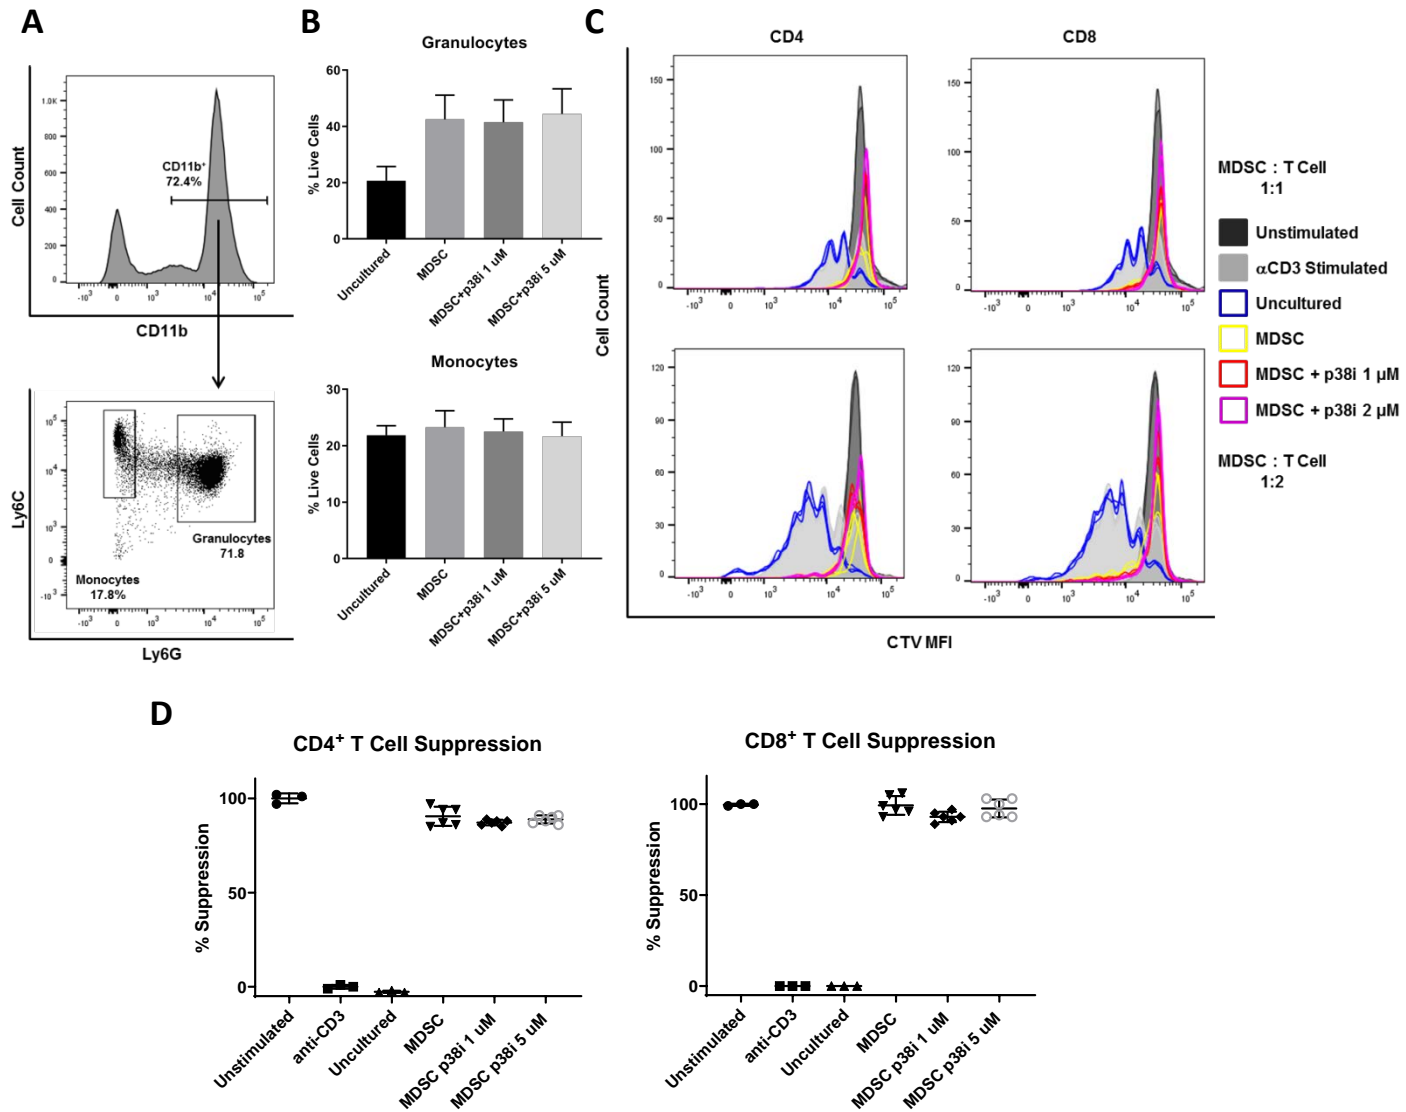

**Supplement Figure 5. Effect of p38 blockade on the immune suppressive activity of MDSCs generated *in vitro*.** (A) Evaluation of the indicated cell population in mouse bone marrow from naïve BALB/c mice. (B) Frequency of monocytic CD11b<sup>+</sup>Ly6C<sup>hi</sup>Ly6G<sup>-</sup> and granulocytic CD11b<sup>+</sup>Ly6C<sup>lo</sup>Ly6G<sup>+</sup> populations before and after incubation of bone marrow cultures for 4 days with recombinant mouse G-CSF and GM-CSF with or without 1-5  $\mu$ M Ralimetinib (n=3). (C) Mean fluorescence intensity (MFI) of Cell Trace Violet (CTV)-labeled CD4<sup>+</sup> and CD8<sup>+</sup> T cell populations incubated alone or in culture with MDSCs. (D) Relative suppression of CD4<sup>+</sup> and CD8<sup>+</sup> T cells by MDSCs.
